# Supplementary material for: Immune Evasion, Cell-Cell Fusion, and Spike Stability of the SARS-CoV-2 XEC Variant: Role of Glycosylation Mutations at the N-terminal Domain
Source: PubMed Central journal article supplement — bioRxiv. 2024 Nov 13:2024.11.12.623078. Preprint. [Version 1] doi: 10.1101/2024.11.12.623078 (PMC11601353; doi:10.1101/2024.11.12.623078), 2024-11-13
Supplement: media-1.pdf [file media-1.pdf]

**Table S1. Bivalent-vaccinated HCW and BA.2.86/JN.1-wave first responder cohorts**

|                                                           | <b>Bivalent Health Care Workers<br/>(n=8)</b> | <b>BA.2.86/JN.1 Wave Patients<br/>(n=9)</b> |
|-----------------------------------------------------------|-----------------------------------------------|---------------------------------------------|
| <b>Age in Years at Sample Collection [Median (Range)]</b> | 39 (27-46)                                    | 51 (34-77)                                  |
| <b>Gender [n (% of Total)]</b>                            |                                               |                                             |
| Male                                                      | 5 (63%)                                       | 5 (56%)                                     |
| Female                                                    | 3 (37%)                                       | 4 (44%)                                     |
| <b>Sample Collection Window</b>                           | Dec. 2022                                     | Nov. 2023-Aug.2024                          |
| <b>Vaccine status [n (% of Total)]</b>                    | NA                                            |                                             |
| 1-dose Pfizer                                             | NA                                            | 1 (10%)                                     |
| 2-dose Moderna                                            | NA                                            | 2 (20%)                                     |
| 4-dose Moderna                                            | NA                                            | 1 (10%)                                     |
| 1-dose Moderna +1-dose Pfizer bivalent                    | NA                                            | 1 (10%)                                     |
| 1-dose Pfizer +1-dose Pfizer bivalent                     | NA                                            | 2(20%)                                      |
| 2-dose Pfizer +1-dose Pfizer bivalent                     | 1 (12.5%)                                     | NA                                          |
| 3-dose Pfizer +1-dose Moderna bivalent                    | NA                                            | 1 (14.3%)                                   |
| 3-dose Pfizer +1-dose Pfizer bivalent                     | 3 (37.5%)                                     | NA                                          |
| 3-dose Moderna +1-dose Moderna bivalent                   | 4 (50%)                                       | 1 (14.3%)                                   |
| Days from last vaccination                                | NA                                            | 621 (34-1033)                               |
| Days post the bivalent dose for recipients                | 65 (23-97)                                    | NA                                          |
| <b>COVID-19 positive [n (% of Total)]</b>                 | 8 (80%)                                       | 9 (100%)                                    |
| Days before sample collection [(Median Range)]            | 324 (182-994)                                 | 7 (1-10)                                    |
| <b>Infected Variants</b>                                  |                                               |                                             |
| JN.1/BA.2.86                                              | NA                                            | 2 (22%)                                     |
| Undetermined                                              | NA                                            | 8 (78%)                                     |

Summary of the demographic information for two cohorts used for neutralization experiments depicted in Figure 2. “NA” means the category is not applicable to the cohort.

| Bivalent HCWs |     |               |     |
|---------------|-----|---------------|-----|
| AD (D614G)    |     | AD (JN.1)     |     |
| JN.1          | 4.9 | D614G         | 4.9 |
| KP.3          | 5.3 | KP.3          | 1.0 |
| KP.3_T22N     | 5.4 | KP.3_T22N     | 1.3 |
| KP.3_F59S     | 6.8 | KP.3_F59S     | 3.6 |
| XEC           | 7.5 | XEC           | 3.3 |
| XEC_S24A      | 6.7 | XEC_S24A      | 4.8 |
| KP.3.1.1      | 7.3 | KP.3.1.1      | 5.0 |
| KP.3.1.1_T33A | 6.1 | KP.3.1.1_T33A | 1.2 |

| BA.2.86/JN.1-wave patients |     |               |     |
|----------------------------|-----|---------------|-----|
| AD (D614G)                 |     | AD (JN.1)     |     |
| JN.1                       | 3.4 | D614G         | 3.4 |
| KP.3                       | 4.1 | KP.3          | 1.7 |
| KP.3_T22N                  | 4.3 | KP.3_T22N     | 1.7 |
| KP.3_F59S                  | 4.9 | KP.3_F59S     | 3.1 |
| XEC                        | 5.7 | XEC           | 3.4 |
| XEC_S24A                   | 5.2 | XEC_S24A      | 4.2 |
| KP.3.1.1                   | 5.3 | KP.3.1.1      | 2.9 |
| KP.3.1.1_T33A              | 4.9 | KP.3.1.1_T33A | 1.8 |

| XBB.1.5-monovalent hamsters |     |               |     |
|-----------------------------|-----|---------------|-----|
| AD (D614G)                  |     | AD (JN.1)     |     |
| JN.1                        | 2.7 | D614G         | 2.7 |
| KP.3                        | 2.7 | KP.3          | 0.2 |
| KP.3_T22N                   | 2.8 | KP.3_T22N     | 0.2 |
| KP.3_F59S                   | 2.5 | KP.3_F59S     | 0.7 |
| XEC                         | 3.0 | XEC           | 0.7 |
| XEC_S24A                    | 3.0 | XEC_S24A      | 0.5 |
| KP.3.1.1                    | 2.7 | KP.3.1.1      | 0.6 |
| KP.3.1.1_T33A               | 2.8 | KP.3.1.1_T33A | 0.7 |

**Figure S1**
